# Supplementary material for: Correlation between tetragonality (c/a) and direct current (dc) bias characteristics of BaTiO3-based multi-layer ceramic capacitors (MLCC)
Source: Royal Society of Chemistry journal article supplement (doi:10.1039/d0tc02067b), 2020-01-01
Supplement: d0tc02067b1.pdf [file d0tc02067b1.pdf]

# Correlation between tetragonality ( $c/a$ ) and direct current (dc) bias characteristics of BaTiO<sub>3</sub>-based multi-layer ceramic capacitors (MLCC)

## Supplementary Information

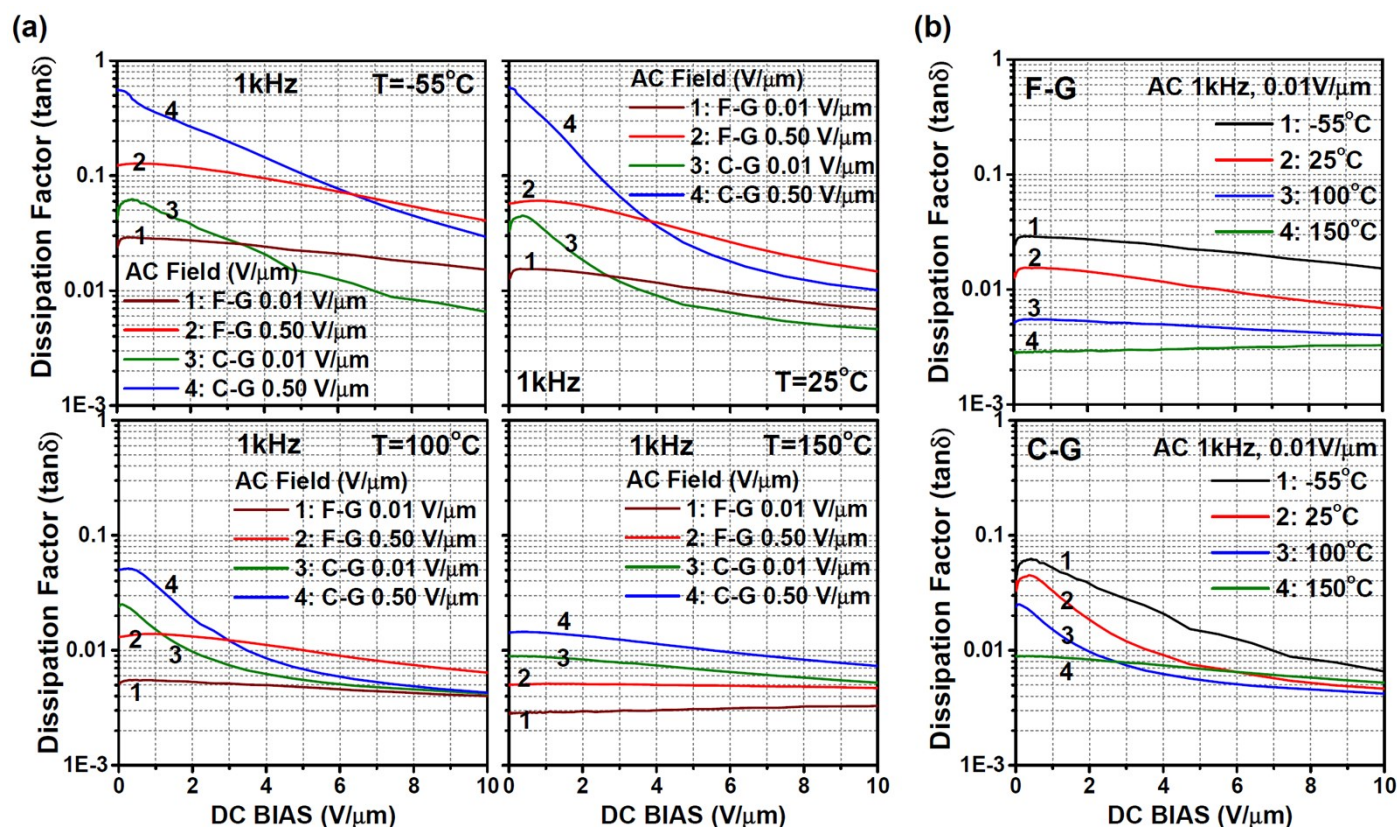

FIG. S1. (a) Dielectric loss versus dc-bias field of F-G and C-G specimens at the temperature of  $-55^\circ\text{C}$ ,  $25^\circ\text{C}$ ,  $100^\circ\text{C}$ , and  $150^\circ\text{C}$ , and (b) the replotted data of FIG. S1. (a) for F-G and C-G specimen separately.
